# Supplementary material for: High Precision U/Th Dating of First Polynesian Settlement
Source: PubMed Central journal article supplement (PMC3492438; doi:10.1371/journal.pone.0048769), 2012-11-07
Supplement: pone.0048769.s006.pdf [file pone.0048769.s006.pdf]

| Sample Name   | U (ppm) | $\pm 2\sigma$ | $^{232}\text{Th}$ (ppb) | $\pm 2\sigma$ | $(^{230}\text{Th}/^{232}\text{Th})$ | $\pm 2\sigma$ | $(^{230}\text{Th}/^{238}\text{U})$ | $\pm 2\sigma$ | $(^{234}\text{U}/^{238}\text{U})$ | $\pm 2\sigma$ | uncorr. $^{230}\text{Th}$ Age (yr) | $\pm 2\sigma$ | corr. $^{230}\text{Th}$ Age (yr) | $\pm 2\sigma$ | corr. $^{230}\text{Th}$ Age (BP) | $\pm 2\sigma$ | Initial $(^{234}\text{U}/^{238}\text{U})$ | $\pm 2\sigma$ |
|---------------|---------|---------------|-------------------------|---------------|-------------------------------------|---------------|------------------------------------|---------------|-----------------------------------|---------------|------------------------------------|---------------|----------------------------------|---------------|----------------------------------|---------------|-------------------------------------------|---------------|
| 2011-020A     | 3.6909  | 0.0008        | 0.0189                  | 0.0005        | 16417                               | 396           | 0.02773                            | 0.00010       | 1.1446                            | 0.0011        | 2677                               | 10            | 2677                             | 10            | 2615                             | 10            | 1.1457                                    | 0.0012        |
| 2011-020B     | 3.7126  | 0.0009        | 0.0197                  | 0.0004        | 15960                               | 322           | 0.02787                            | 0.00007       | 1.1442                            | 0.0011        | 2692                               | 8             | 2692                             | 8             | 2630                             | 8             | 1.1453                                    | 0.0011        |
| 2011-020 mean |         |               |                         |               |                                     |               |                                    |               |                                   |               |                                    |               |                                  |               | 2625                             | 6             |                                           |               |
| 2011-021A     | 3.5106  | 0.0008        | 0.0190                  | 0.0004        | 16211                               | 349           | 0.02893                            | 0.00012       | 1.1443                            | 0.0009        | 2795                               | 12            | 2795                             | 12            | 2733                             | 12            | 1.1454                                    | 0.0009        |
| 2011-021B     | 3.5482  | 0.0010        | 0.0093                  | 0.0007        | 34944                               | 2582          | 0.03018                            | 0.00015       | 1.1454                            | 0.0011        | 2914                               | 14            | 2914                             | 14            | 2852                             | 14            | 1.1466                                    | 0.0012        |
| 2011-021 mean |         |               |                         |               |                                     |               |                                    |               |                                   |               |                                    |               |                                  |               | <b>2793</b>                      | <b>13</b>     |                                           |               |
| 2011-022A     | 3.6128  | 0.0011        | 0.0178                  | 0.0005        | 17733                               | 530           | 0.02882                            | 0.00010       | 1.1448                            | 0.0013        | 2783                               | 10            | 2782                             | 10            | 2721                             | 10            | 1.1459                                    | 0.0013        |
| 2011-022B     | 3.6159  | 0.0008        | 0.0136                  | 0.0004        | 23353                               | 685           | 0.02887                            | 0.00011       | 1.1446                            | 0.0014        | 2789                               | 11            | 2789                             | 11            | 2727                             | 11            | 1.1457                                    | 0.0014        |
| 2011-022 mean |         |               |                         |               |                                     |               |                                    |               |                                   |               |                                    |               |                                  |               | 2724                             | 8             |                                           |               |
| 2011-023A     | 3.6211  | 0.0008        | 0.0002                  | 0.0000        | 1986695                             | 124602        | 0.02875                            | 0.00009       | 1.1436                            | 0.0012        | 2779                               | 9             | 2779                             | 9             | 2717                             | 9             | 1.1447                                    | 0.0012        |
| 2011-023B     | 3.5041  | 0.0010        | 0.0077                  | 0.0002        | 39903                               | 1269          | 0.02898                            | 0.00010       | 1.1454                            | 0.0009        | 2797                               | 10            | 2797                             | 10            | 2735                             | 10            | 1.1465                                    | 0.0009        |
| 2011-023 mean |         |               |                         |               |                                     |               |                                    |               |                                   |               |                                    |               |                                  |               | 2726                             | 7             |                                           |               |
| 2011-024      | 3.8078  | 0.0012        | 0.0062                  | 0.0002        | 54019                               | 1616          | 0.02899                            | 0.00010       | 1.1446                            | 0.0010        | 2800                               | 10            | 2800                             | 10            | 2738                             | 10            | 1.1457                                    | 0.0010        |
| 2011-025A     | 3.7899  | 0.0011        | 0.0038                  | 0.0002        | 87887                               | 3936          | 0.02872                            | 0.00007       | 1.1449                            | 0.0009        | 2772                               | 8             | 2772                             | 8             | 2711                             | 8             | 1.1460                                    | 0.0009        |
| 2011-025B     | 3.7523  | 0.0011        | 0.0068                  | 0.0002        | 48143                               | 1612          | 0.02858                            | 0.00008       | 1.1454                            | 0.0014        | 2758                               | 9             | 2758                             | 9             | 2696                             | 9             | 1.1466                                    | 0.0014        |
| 2011-025 mean |         |               |                         |               |                                     |               |                                    |               |                                   |               |                                    |               |                                  |               | 2704                             | 6             |                                           |               |
| 2011-026A     | 3.3312  | 0.0008        | 0.0196                  | 0.0004        | 15013                               | 286           | 0.02915                            | 0.00012       | 1.1450                            | 0.0011        | 2815                               | 12            | 2814                             | 12            | 2753                             | 12            | 1.1462                                    | 0.0011        |
| 2011-026B     | 3.3507  | 0.0006        | 0.0277                  | 0.0003        | 10724                               | 130           | 0.02922                            | 0.00009       | 1.1454                            | 0.0012        | 2821                               | 10            | 2820                             | 10            | 2759                             | 10            | 1.1465                                    | 0.0012        |
| 2011-026 mean |         |               |                         |               |                                     |               |                                    |               |                                   |               |                                    |               |                                  |               | 2756                             | 7             |                                           |               |
| 2011-027A     | 3.1054  | 0.0009        | 0.8847                  | 0.0009        | 355                                 | 1             | 0.03337                            | 0.00011       | 1.1453                            | 0.0014        | 3227                               | 12            | 3220                             | 12            | 3165                             | 12            | 1.1466                                    | 0.0014        |
| 2011-027B     | 2.9837  | 0.0011        | 1.3719                  | 0.0014        | 236                                 | 1             | 0.03580                            | 0.00009       | 1.1469                            | 0.0010        | 3461                               | 9             | 3449                             | 11            | 3399                             | 11            | 1.1483                                    | 0.0010        |
| 2011-027 mean |         |               |                         |               |                                     |               |                                    |               |                                   |               |                                    |               |                                  |               | <b>3282</b>                      | <b>12</b>     |                                           |               |
| 2011-028A     | 3.8986  | 0.0008        | 0.0881                  | 0.0005        | 3824                                | 23            | 0.02846                            | 0.00008       | 1.1445                            | 0.0012        | 2749                               | 9             | 2748                             | 9             | 2687                             | 9             | 1.1456                                    | 0.0012        |
| 2011-028B     | 4.4989  | 0.0018        | 0.0135                  | 0.0004        | 30472                               | 946           | 0.03009                            | 0.00009       | 1.1461                            | 0.0010        | 2903                               | 10            | 2903                             | 10            | 2842                             | 10            | 1.1473                                    | 0.0010        |
| 2011-028 mean |         |               |                         |               |                                     |               |                                    |               |                                   |               |                                    |               |                                  |               | <b>2764</b>                      | <b>9</b>      |                                           |               |
| 2011-029A     | 4.1175  | 0.0023        | 0.0064                  | 0.0002        | 56497                               | 2017          | 0.02883                            | 0.00010       | 1.1439                            | 0.0009        | 2786                               | 10            | 2786                             | 10            | 2725                             | 10            | 1.1450                                    | 0.0009        |
| 2011-029B     | 3.2376  | 0.0009        | 0.0096                  | 0.0003        | 29595                               | 918           | 0.02898                            | 0.00012       | 1.1444                            | 0.0010        | 2799                               | 12            | 2799                             | 12            | 2737                             | 12            | 1.1455                                    | 0.0010        |
| 2011-029 mean |         |               |                         |               |                                     |               |                                    |               |                                   |               |                                    |               |                                  |               | 2730                             | 8             |                                           |               |
| 2011-030      | 3.2208  | 0.0008        | 0.0771                  | 0.0008        | 3620                                | 39            | 0.02855                            | 0.00010       | 1.1463                            | 0.0009        | 2753                               | 10            | 2753                             | 10            | 2692                             | 10            | 1.1474                                    | 0.0009        |
| 2011-032A     | 3.5264  | 0.0007        | 0.0022                  | 0.0001        | 69152                               | 4275          | 0.02865                            | 0.00012       | 1.1457                            | 0.0009        | 2763                               | 12            | 2763                             | 12            | 2702                             | 12            | 1.1469                                    | 0.0009        |
| 2011-032B     | 3.5935  | 0.0007        | 0.0059                  | 0.0003        | 52576                               | 2336          | 0.02862                            | 0.00011       | 1.1447                            | 0.0011        | 2763                               | 11            | 2763                             | 11            | 2701                             | 11            | 1.1459                                    | 0.0011        |
| 2011-032 mean |         |               |                         |               |                                     |               |                                    |               |                                   |               |                                    |               |                                  |               | 2702                             | 8             |                                           |               |
| 2011-033A     | 4.2523  | 0.0010        | 0.0184                  | 0.0011        | 20811                               | 1188          | 0.02974                            | 0.00014       | 1.1450                            | 0.0011        | 2873                               | 14            | 2872                             | 14            | 2811                             | 14            | 1.1462                                    | 0.0011        |
| 2011-033B     | 4.0647  | 0.0010        | 0.0116                  | 0.0003        | 31523                               | 756           | 0.02953                            | 0.00010       | 1.1444                            | 0.0009        | 2853                               | 10            | 2853                             | 10            | 2791                             | 10            | 1.1456                                    | 0.0009        |
| 2011-033 mean |         |               |                         |               |                                     |               |                                    |               |                                   |               |                                    |               |                                  |               | 2798                             | 8             |                                           |               |
| 2011-034A     | 4.4772  | 0.0011        | 0.0150                  | 0.0006        | 27121                               | 1098          | 0.02987                            | 0.00012       | 1.1454                            | 0.0009        | 2884                               | 12            | 2884                             | 12            | 2822                             | 12            | 1.1466                                    | 0.0009        |
| 2011-034B     | 4.4503  | 0.0009        | 0.0218                  | 0.0005        | 18270                               | 383           | 0.02953                            | 0.00012       | 1.1458                            | 0.0010        | 2849                               | 12            | 2849                             | 12            | 2788                             | 12            | 1.1470                                    | 0.0010        |
| 2011-034 mean |         |               |                         |               |                                     |               |                                    |               |                                   |               |                                    |               |                                  |               | 2805                             | 8             |                                           |               |
| 2011-036A     | 4.7577  | 0.0011        | 0.0288                  | 0.0006        | 15029                               | 330           | 0.02994                            | 0.00012       | 1.1450                            | 0.0006        | 2892                               | 12            | 2891                             | 12            | 2830                             | 12            | 1.1462                                    | 0.0006        |
| 2011-036B     | 4.8567  | 0.0014        | 0.0306                  | 0.0006        | 14517                               | 288           | 0.03012                            | 0.00011       | 1.1460                            | 0.0011        | 2907                               | 11            | 2907                             | 11            | 2845                             | 11            | 1.1472                                    | 0.0011        |
| 2011-036 mean |         |               |                         |               |                                     |               |                                    |               |                                   |               |                                    |               |                                  |               | 2838                             | 8             |                                           |               |
| 2011-037A     | 5.2961  | 0.0013        | 0.0106                  | 0.0005        | 40851                               | 1888          | 0.02699                            | 0.00011       | 1.1452                            | 0.0009        | 2603                               | 11            | 2603                             | 11            | 2541                             | 11            | 1.1462                                    | 0.0010        |
| 2011-037B     | 5.3041  | 0.0015        | 0.0122                  | 0.0006        | 35327                               | 1706          | 0.02680                            | 0.00010       | 1.1460                            | 0.0011        | 2583                               | 10            | 2583                             | 10            | 2521                             | 10            | 1.1471                                    | 0.0011        |
| 2011-037 mean |         |               |                         |               |                                     |               |                                    |               |                                   |               |                                    |               |                                  |               | 2530                             | 7             |                                           |               |
